# Supplementary material for: Atomic-scale imaging of the growth and transformation of Pt3Ni–NiO nanoparticles
Source: Royal Society of Chemistry journal article supplement (doi:10.1039/d0nj05237j), 2021-01-01
Supplement: d0nj05237j7.pdf [file d0nj05237j7.pdf]

## 1. Movie Captions

**Movie S1:** the growth trajectory of the Pt-Ni-oxide core-shell nanoparticles in the precursor solution with Pt:Ni=1:1.25. The movie plays twelve times faster than real time. The dose rate during the data collection is about 3320 e/Å<sup>2</sup>·s.

**Movie S2:** the dynamic structural evolution during the growth of Pt-Ni-oxide core-shell nanoparticles in the precursor solution with Pt:Ni=1:1.25 at a high dose rate. The movie plays twelve times faster than real time. The dose rate during the data collection is about 4900 e/Å<sup>2</sup>·s.

**Movie S3:** the dynamic facet transformation of NiO nanocrystal from {100} facet to {110} facet via Ni nanoparticle with {100} facet as intermediate in the precursor solution with Pt:Ni=1:1.25. The movie plays six times faster than real time. The dose rate during the data collection is about 4900 e/Å<sup>2</sup>·s.

**Movie S4:** the formation of new interface structure of Pt<sub>3</sub>Ni-Ni nanoparticles in the precursor solution with Pt:Ni=1:1.25. The movie plays three times faster than real time. The dose rate during the data collection is about 6873 e/Å<sup>2</sup>·s.

**Movie S5:** the growth trajectory of Pt<sub>3</sub>Ni nanowires in the precursor solution with Pt:Ni=2.5:1 at low dose rate. The movie plays twelve times faster than real time. The dose rate during the data collection is about 2520 e/Å<sup>2</sup>·s.

**Movie S6:** the growth trajectory of Pt<sub>3</sub>Ni nanowires in the precursor solution with Pt:Ni=2.5:1 at low dose rate. The movie plays twelve times faster than real time. The dose rate during the data collection is about 5000 e/Å<sup>2</sup>·s.
